# Supplementary material for: High-Dose Chemotherapy with Stem Cell Rescue in Desmoplastic Small Round Cell Tumor: A Single-Institution Experience and Review of the Literature
Source: Hindawi journal article supplement (doi:10.1155/2018/1948093), 2018-01-01
Supplement: f1 [file 1948093.f1.pdf]

|                                  |                                      |
|----------------------------------|--------------------------------------|
| <b>512 Publications Reviewed</b> |                                      |
|                                  |                                      |
|                                  | <b>492 Publications Omitted for:</b> |
|                                  | ≤ 2 patients (n=249)                 |
|                                  | Not DSRCT diagnosis (n=231)          |
|                                  | No individual OS data (n=7)          |
|                                  | Single agent study (n=5)             |
|                                  |                                      |
| <b>20 Publications</b>           |                                      |
| n=279 patients                   |                                      |
|                                  |                                      |
|                                  | <b>n=23 Patients Omitted for:</b>    |
|                                  | No OS data (n=17)                    |
|                                  | Initial misdiagnosis (n=2)           |
|                                  | Palliative treatment only (n=2)      |
|                                  | Suspected overlap (n=2)              |
|                                  |                                      |
| <b>n=256 Patients</b>            |                                      |
| SCT <sup>1</sup> patients (n=79) | No SCT (n=185)                       |

SUPPLEMENTARY FIGURE S1. Flow Chart of Literature Review

<sup>1</sup> SCT = Stem Cell Transplant

A

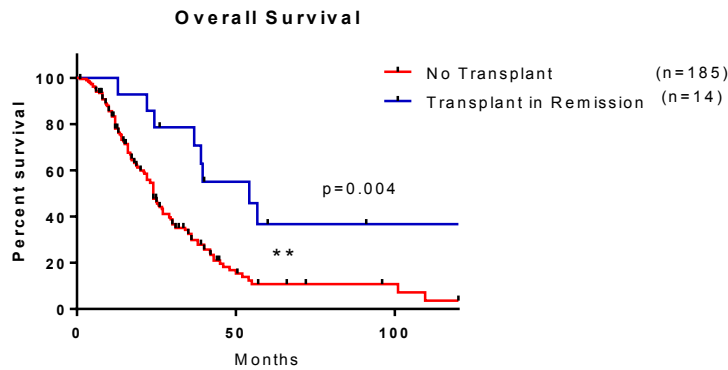

B

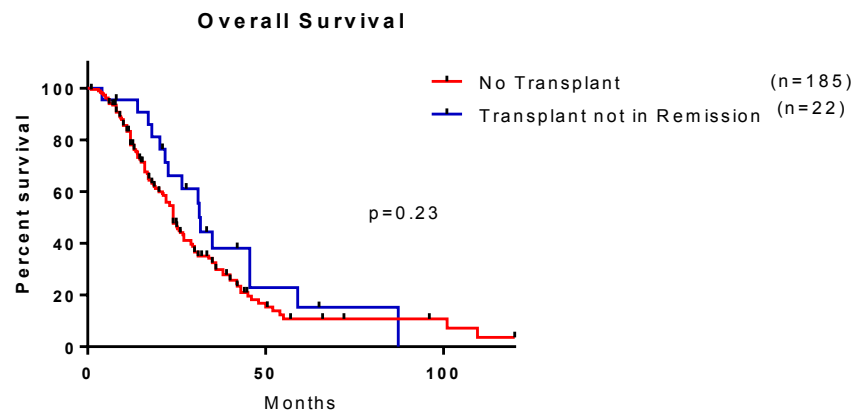

C

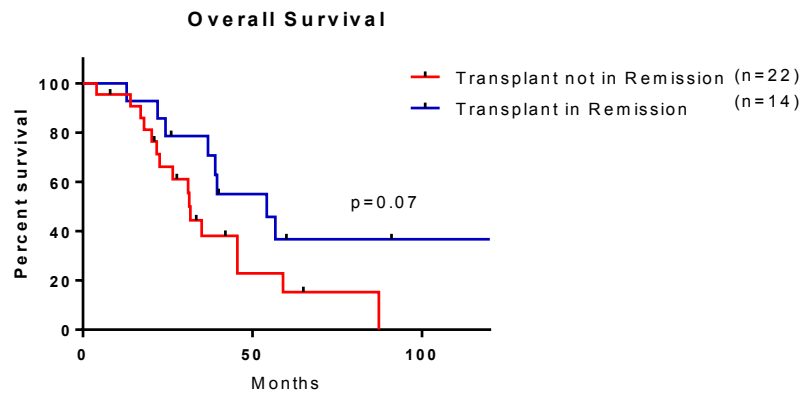

SUPPLEMENTARY FIGURE 2 A Kaplan-Meier curve of patients who had Stem Cell Transplant in remission and patients who did not have Stem Cell Transplant. B . Kaplan-Meier curve of patients who did not have Stem Cell Transplant and patients who had a Stem Cell Transplant not in remission. C Kaplan-Meier curve of patients who had Stem Cell Transplant in remission and patients who had a Stem Cell Transplant not in remission.

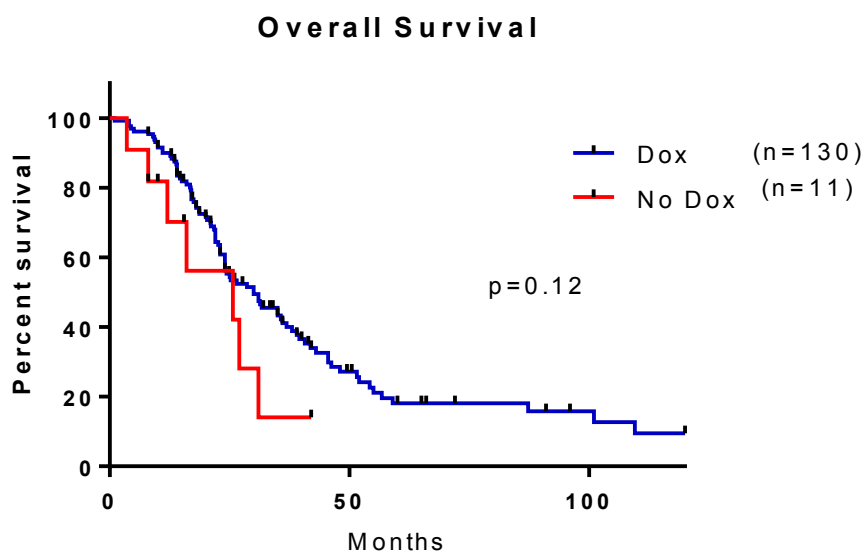

SUPPLEMENTARY FIGURE S3 Kaplan-Meier curve of patients who had doxorubicin as part of their chemotherapy regimen and patients who did not have doxorubicin as part of their regimen. (Dox = doxorubicin)

| <b>Author</b> | <b>Year</b> | <b>Includes<br/>some SCT<sup>1</sup><br/>patients</b> | <b>Number of<br/>Patients In<br/>Paper</b> |
|---------------|-------------|-------------------------------------------------------|--------------------------------------------|
| Gerald        | 1991        | no                                                    | 19                                         |
| Parkash       | 1995        | no                                                    | 3                                          |
| Farhat        | 1996        | no                                                    | 5                                          |
| Ordonez       | 1998        | no                                                    | 39                                         |
| Kurre         | 2000        | no                                                    | 3                                          |
| Liang         | 2000        | no                                                    | 3                                          |
| Gil           | 2004        | no                                                    | 7                                          |
| Msika         | 2010        | no                                                    | 3                                          |
| Tang          | 2015        | no                                                    | 18                                         |
| Zhang         | 2015        | no                                                    | 11                                         |
| Kretschmar    | 1996        | yes                                                   | 3                                          |
| Kushner       | 1996        | yes                                                   | 12                                         |
| Cummings      | 1997        | yes                                                   | 6                                          |
| Lae           | 2002        | yes                                                   | 32                                         |
| Livaditi      | 2006        | yes                                                   | 5                                          |
| Saab          | 2007        | yes                                                   | 11                                         |
| Bisogno       | 2010        | yes                                                   | 14                                         |
| Hayes-Jordan  | 2010        | yes                                                   | 24                                         |
| Philippe      | 2012        | yes                                                   | 38                                         |
| Forlenza      | 2015        | yes                                                   | 19                                         |
| CHAM          | 2016        | yes                                                   | 4                                          |
| <b>Total</b>  |             |                                                       | <b>279</b>                                 |

SUPPLEMENTARY TABLE S1 All Studies Included in Literature Review

<sup>1</sup>SCT is Stem Cell Transplant.
